# Supplementary material for: The Impact of Postoperative Complications on Survival after Simultaneous Resection of Colorectal Cancer and Liver Metastases
Source: MDPI journal article supplement (doi:10.3390/healthcare10081573), 2022-08-19
Supplement: s1 [file s1]

**Supplementary Table S1.** Demographics, clinical, pathological and postoperative complications of the patients

| Variable                                           | Number of patients (%) |
|----------------------------------------------------|------------------------|
| <b>Age</b>                                         |                        |
| ≤ 65 y-o                                           | 151 (62.1%)            |
| > 65 y-o                                           | 92 (37.9%)             |
| <b>Gender</b>                                      |                        |
| Male                                               | 140 (57.6%)            |
| Female                                             | 103 (42.4%)            |
| <b>Primary tumor location</b>                      |                        |
| Right Colon                                        | 48 (19.7%)             |
| Left colon                                         | 105 (43.2%)            |
| Rectum                                             | 90 (37.1%)             |
| <b>T stage</b>                                     |                        |
| T1                                                 | 1 (0.4%)               |
| T2                                                 | 6 (2.4%)               |
| T3                                                 | 216 (88.8%)            |
| T4                                                 | 17 (7.0%)              |
| NA                                                 | 3 (1.2%)               |
| <b>N stage</b>                                     |                        |
| N0                                                 | 77 (31.7%)             |
| N1                                                 | 78 (32.1%)             |
| N2                                                 | 83 (34.2%)             |
| NA                                                 | 5 (2%)                 |
| <b>Distributions of SCLMs</b>                      |                        |
| Unilobar                                           | 176 (72.5%)            |
| Bilobar                                            | 67 (27.5%)             |
| <b>Number of SCLMs</b>                             |                        |
| 1                                                  | 137 (56.3%)            |
| 2-3                                                | 73 (30.1%)             |
| ≥ 4                                                | 33 (13.6%)             |
| <b>Size of SCLMs</b>                               |                        |
| < 3 cm                                             | 126 (51.9%)            |
| ≥ 3 cm                                             | 117 (48.1%)            |
| <b>TBS score</b>                                   |                        |
| ≤ 3.2                                              | 120 (49.3%)            |
| > 3.2                                              | 123 (50.7%)            |
| <b>Type of hepatectomy</b>                         |                        |
| Anatomic                                           | 34 (14%)               |
| Non-anatomic                                       | 209 (86%)              |
| <b>Extension of hepatectomy</b>                    |                        |
| Minor                                              | 211 (86.8%)            |
| Major                                              | 32 (13.2%)             |
| <b>Postoperative complications (Clavien-Dindo)</b> |                        |
| No complications                                   |                        |
| I                                                  | 121 (49.7%)            |

|                                                        |                  |
|--------------------------------------------------------|------------------|
| II                                                     | 20 (8.3%)        |
| III                                                    | 48 (19.7%)       |
| IV                                                     | 35 (14.5%)       |
| V                                                      | 7 (2.9%)         |
|                                                        | 12 (4.9%)        |
| <b>Septic complications</b>                            |                  |
| No                                                     | 157 (64.6%)      |
| Yes                                                    | 86 (35.4%)       |
| <b>Hepatic complications</b>                           |                  |
| No                                                     | 184 (75.7)       |
| Yes                                                    | 59 (24.3%)       |
| <b>Hepatic septic complications</b>                    |                  |
| No                                                     | 203 (83.5%)      |
| Yes                                                    | 40 (16.5%)       |
| <b>Comprehensive complication index (median [IQR])</b> | 8.70 (0 - 26.20) |
| <b>Neoadjuvant treatment</b>                           |                  |
| No                                                     | 210 (86.4%)      |
| Yes                                                    | 33 (13.6%)       |
| <b>Adjuvant treatment</b>                              |                  |
| No                                                     | 29 (11.9%)       |
| Yes                                                    | 214 (88.1%)      |
